# Supplementary material
Source: PubMed Central journal article supplement (PMC2815900)
Supplement: pp.109.147330_1.pdf [file pp.109.147330_1.pdf]

Figure S1

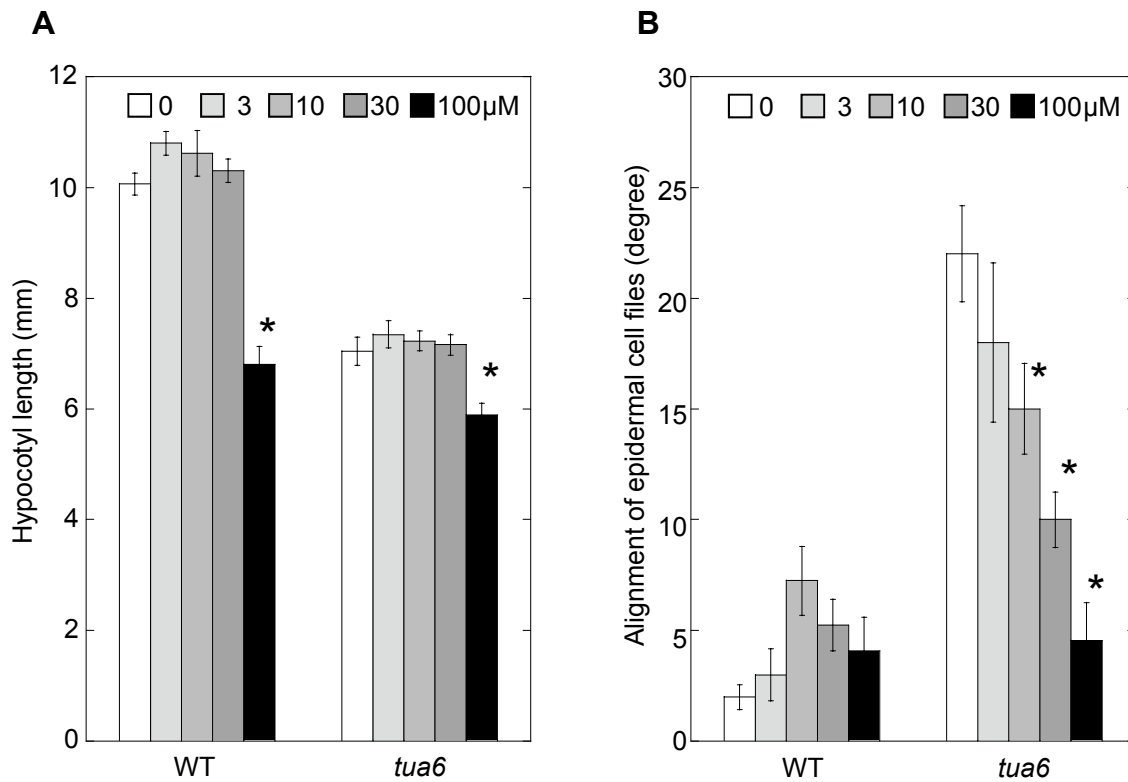

**Figure S1.** Effects of gadolinium ions on elongation growth and alignment of epidermal cell files in hypocotyls of *Arabidopsis tubulin* mutants. For gadolinium treatment, *Arabidopsis* seedlings were grown on agar medium containing various concentrations of gadolinium chloride at 1 g for 72 h at 25°C. (A) The length of hypocotyls was measured using a scale. (B) The angle of epidermal cells 10-12 was measured as in Figure 4. Values are means  $\pm$  SE (n = 20). \*, Mean values significantly different from the control (in the absence of gadolinium) (P<0.05).

Figure S2

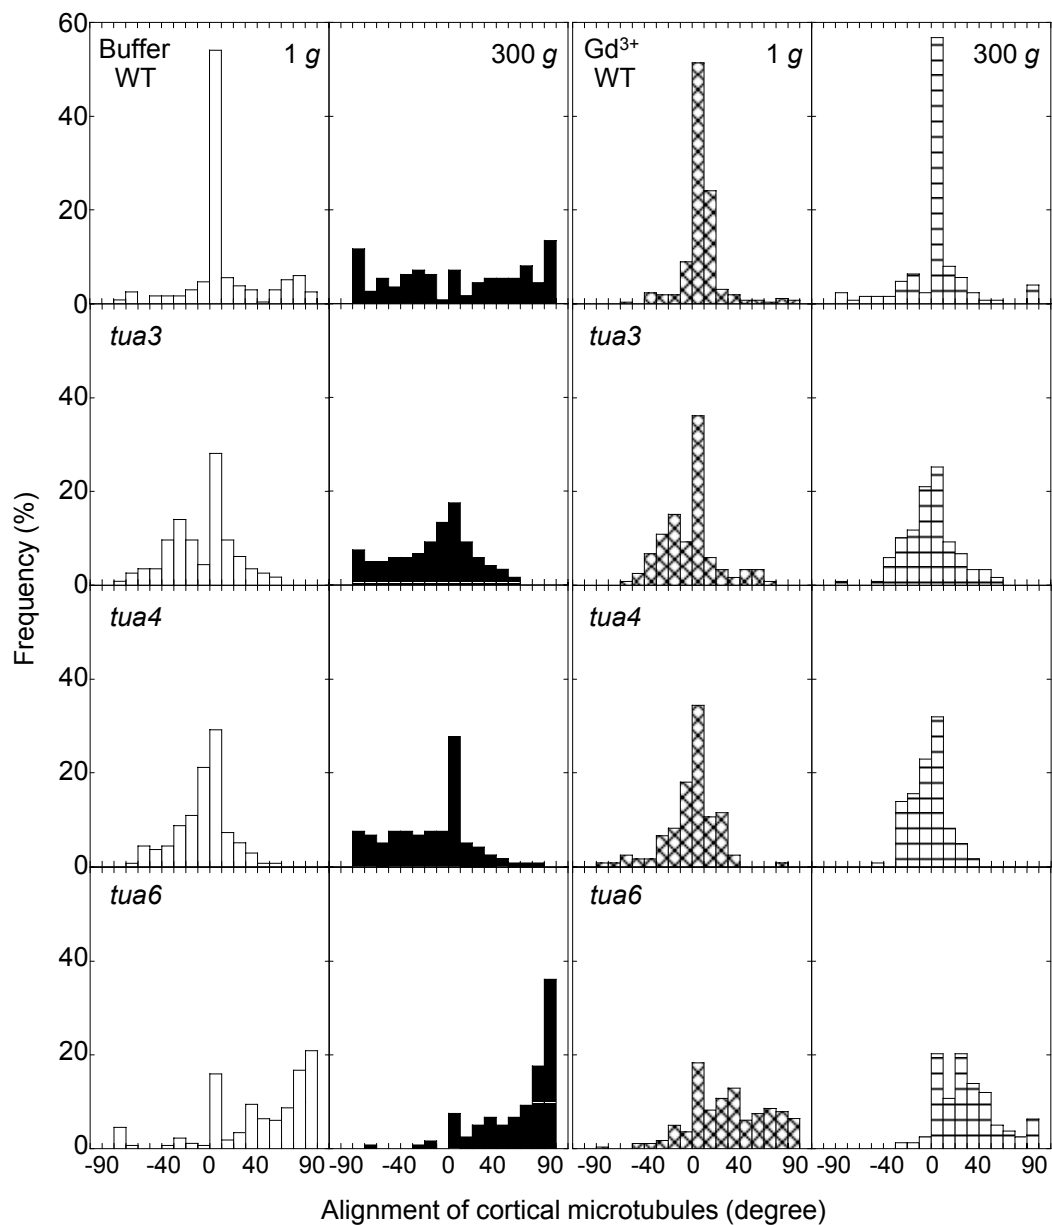

**Figure S2.** Effects of gadolinium ions on alignment of cortical microtubules in Arabidopsis tubulin mutants. WT and tubulin mutants were grown as in Figure 8. Epidermal cells 10-12 were stained as described in MATERIALS AND METHODS. All values were taken from immunofluorescence micrographs in the region, as shown in Figure 9A.

Figure S3

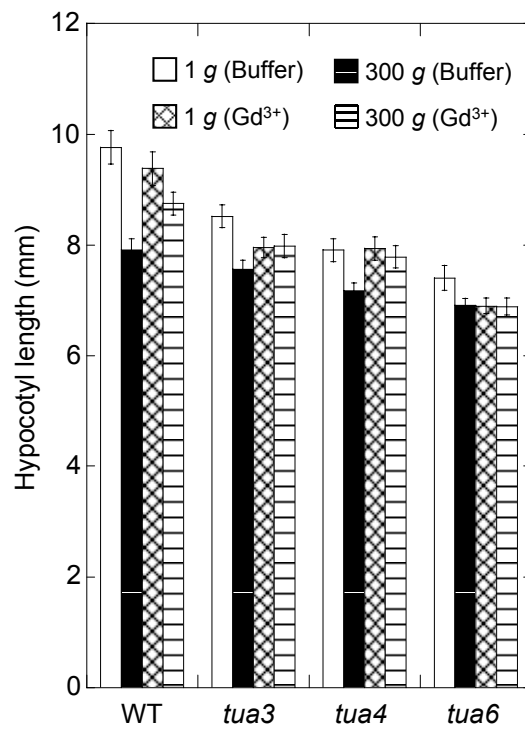

**Figure S3.** Effects of gadolinium ions on elongation growth in hypocotyls of Arabidopsis tubulin mutants. WT and tubulin mutants were grown as in Figure 8. The length was measured using a scale. Values are means  $\pm$  SE (n = 20).
